# Supplementary material for: An Immortalized Hepatocyte-Like Cell Line (imHC) Accommodated Complete Viral Lifecycle, Viral Persistence Form, cccDNA and Eventual Spreading of a Clinically-Isolated HBV
Source: MDPI journal article supplement (doi:10.3390/v11100952), 2019-10-16
Supplement: s1 [file s1]

## Supplementary Material

**Figure S1 Western blot analysis of NTCP.** The glycosylated (50 kDa) and non-glycosylated-NTCP (32 kDa) were illustrated in the undifferentiated form of both HepaRG and imHC. The differentiation protocol drove NTCP toward the glycosylated form. GAPDH served as the control.

**Figure S2 The abundance of intracellular HBV DNA after infection.** The host cells (imHC and HepaRG) infected with either HBVcc or HBV<sup>+</sup> plasma were monitored for the abundance of intracellular HBV DNA. The intracellular HBV DNA levels were normalized with that of GAPDH.

**Figure S3 Second HBV progeny could infect naïve imHC.** Naïve imHCs were infected with HBV particles derived from imHC (HBVimHC) at MOI of 10 for 7 days. Immunofluorescence was performed to detect HBcAg in infected cells. Naïve imHCs were either mock-infected (A), or inoculated with the conditioned medium containing HBV particles released from infected imHC (B). The infectivity was manually counted from the frequency of HBcAg-positive cell counts per 1000 total cells. The result was 44.36%.

**Figure S4 The frequencies of HBcAg positive cells declined after the treatment with CyA, an entry inhibitor.** Uninfected imHCs counterstained with DAPI underwent either mock infection (A), or staining with goat-anti mouse-Alexa fluor 568 (isotype control, B). The infected imHCs that have been either untreated (C) or treated with 4  $\mu$ M CyA (D) were stained with anti-HBcAg-Alexa fluor 568 (D) and counterstained with DAPI.

**Figure S5 HBV spread from infected hepatocytes to naïve cells.** Infected imHCs were co-cultured with CMFDA-stained naïve cells. The co-culture of uninfected imHCs and CMFDA-stained naïve cells served as a negative control (A). The infected imHCs alone were stained with anti-HBcAg-Alexa fluor 568 (B). The co-culture of CMFDA-stained naïve cells with imHCs infected with either HBV<sup>+</sup> plasma (C) or HepG2.2.15 (D) exhibited the staining of HBcAg that indicated the presence of “HBV spreading”.

**Table S1** Primer sets and conditions used in quantitative real-time PCR.

**Table S1.** Primer sets and conditions used in quantitative real-time PCR (qPCR)

| Gene    | Genbank<br>Accession | Sense primer<br>5'-----> 3' (Tm °C)       | Antisense primer<br>3'-----> 5' (Tm °C)   | Amplicon<br>size (bp) | Annealin<br>g temp.<br>(°C) | Putative function                                              | References                                |
|---------|----------------------|-------------------------------------------|-------------------------------------------|-----------------------|-----------------------------|----------------------------------------------------------------|-------------------------------------------|
| NTCP    | NM_003049.4          | GGACATGAACCTCAGCATT<br>GTG (59.8)         | ATCATAGATCCCCCTGGAG<br>TAGAT (59.4)       | 100                   | 60                          | Na <sup>+</sup> -taurocholate<br>cotransporting<br>polypeptide | (Appelman<br>et al., 2017)                |
| ISG     | NM_005101.4          | CACCTGAAGCAGCAAGTGA<br>GCGGGCTGGAG (73.7) | CCGCAGGCGCAGATTCATG<br>AACACGGTGCT (74.1) | 150                   | 60                          | ISG15 ubiquitin<br>like modifier                               | (Kaneko et<br>al., 2016)                  |
| MxA     | NM_002462.5          | GCCAGCAGCTTCAGAAGGC<br>CATGCTGCAGC (74.8) | GGGCAAGCCGGCGCCGAG<br>CCTGCGTCAGCC (82.1) | 150                   | 60                          | MX dynamin like<br>GTPase 1                                    | (Kaneko et<br>al., 2016)                  |
| PKR     | NM_0011356<br>51.3   | TTTGAAACATCAAAGTTTT<br>TCACAGACCTA (60.9) | CACAGTCAAGGTCCTTAGT<br>ATTTCAGATGT (62.8) | 150                   | 60                          | protein kinase R                                               | (Kaneko et<br>al., 2016)                  |
| HBV DNA | MH981305.1           | GTTGCCCGTTTGCTCTCTAA<br>TTC (60.1)        | GGAGGGATACATAGAGGTT<br>CCTTGA (60.9)      | 100                   | 60                          | HBV polymerase<br>gene                                         | (Untergasse<br>r et al.,<br>2006)         |
| cccDNA  | MH464854.1           | GACTCTCTCGTCCCCTTCTC<br>(58.6)            | ATGGTGAGGTGAACAATGC<br>T (57.4)           | 579                   | 60                          | HBV genomic<br>DNA                                             | (Untergasse<br>r et al.,<br>2006)         |
| PRNP    | MH568683.1           | AGTCAGTGGAACAAGCCG<br>AG (59.9)           | TGGCACTTCCCAGCATGTA<br>G (60.0)           | 112                   | 60                          | prion protein                                                  | in house<br>design                        |
| GAPDH   | NG_009349.4          | GAAATCCCATCACCATCTT<br>CC (55.0)          | AAATGAGCCCCAGCCTTCT<br>C (59.6)           | 124                   | 60                          | glyceraldehyde-3-p<br>dehydrogenase                            | (Sa-<br>Ngiamsumt<br>orn et al.,<br>2016) |

## References

- Appelman, M.D., Chakraborty, A., Protzer, U., McKeating, J.A., and van de Graaf, S.F.J. (2017). N-Glycosylation of the Na<sup>+</sup>-Taurocholate Cotransporting Polypeptide (NTCP) Determines Its Trafficking and Stability and Is Required for Hepatitis B Virus Infection. *PLOS ONE* 12(1), e0170419. doi: 10.1371/journal.pone.0170419.
- Kaneko, S., Kakinuma, S., Asahina, Y., Kamiya, A., Miyoshi, M., Tsunoda, T., et al. (2016). Human induced pluripotent stem cell-derived hepatic cell lines as a new model for host interaction with hepatitis B virus. *Scientific Reports* 6, 29358. doi: 10.1038/srep29358
- <https://www.nature.com/articles/srep29358#supplementary-information>.
- Sa-Ngiamsumtorn, K., Wongkajornsilp, A., Phanthong, P., Borwornpinyo, S., Kitiyanant, N., Chantratita, W., et al. (2016). A robust model of natural hepatitis C infection using hepatocyte-like cells derived

from human induced pluripotent stem cells as a long-term host. *Virology* 13(1), 59. doi: 10.1186/s12985-016-0519-1.

Untergasser, A., Zedler, U., Langenkamp, A., Hosel, M., Quasdorff, M., Esser, K., et al. (2006). Dendritic cells take up viral antigens but do not support the early steps of hepatitis B virus infection. *Hepatology* 43(3), 539-547. doi: 10.1002/hep.21048.
